# Supplementary material for: TopoToolbox 2 – MATLAB-based software for topographic analysis and modeling in Earth surface sciences
Source: Copernicus journal article supplement (doi:10.5194/esurf-2-1-2014), 2014-01-15
Supplement: Supplementary file 1 [file esurf-2-1-2014-supplement.zip]

## TopoToolbox 2 - calculating the multiple flow direction

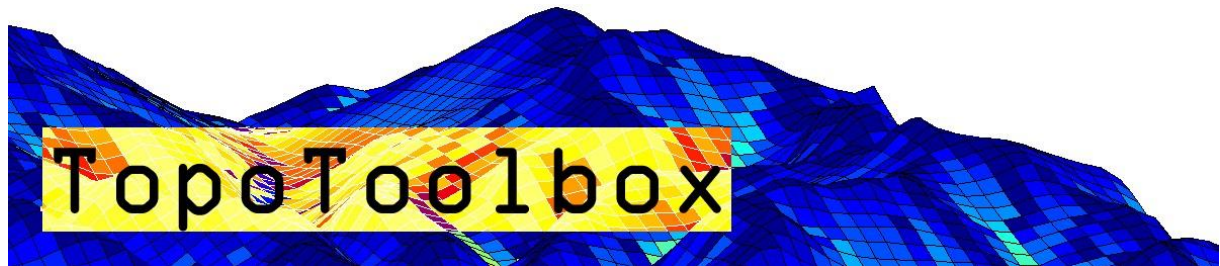

With the introduction of TopoToolbox 2, the new FLOWobj does only support the single (D8) flow direction algorithm. If you have been a user of TopoToolbox 1 and require the multiple flow direction (MFD) algorithm, please read these pages.

|                            |   |
|----------------------------|---|
| Requirements .....         | 1 |
| Here is how to do it ..... | 1 |
| Future developments .....  | 2 |

### Requirements

If you want to use the MFD algorithm with TopoToolbox 2, you must have a previous version (e.g. TopoToolbox 1.6) on your search path.

### Here is how to do it

```
% get the coordinate vectors and the DEM in the format required by the
% function flowdir
[dem,X,Y] = GRIDobj2mat(fillinks(DEM));
% use meshgrid to calculate coordinate matrices
[X,Y] = meshgrid(X,Y);
% calculate the flow direction matrix M
M = flowdir(X,Y,double(dem));
```

Now you should calculate the desired topographic attribute directly from M, e.g. flow accumulation

```
A = flowacc(M,size(dem));
```

and convert the output back to a GRIDobj.

```

A = GRIDobj(X,Y,A);
% if there is projection information in the property .georef, you can copy
% it from the DEM.
A.georef = DEM.georef;
% and plot it
imageschs(DEM,log(A));

```

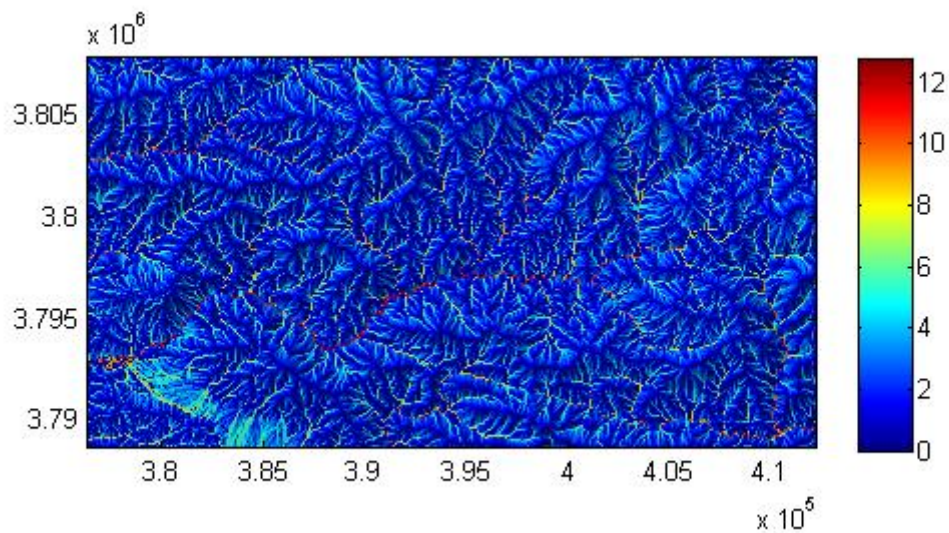

and this is it.

## Future developments

The fact, that TT2 currently does not support the MFD algorithm is unsatisfactory. We are currently working on including MFD in future version of TT.
